# Supplementary material for: Effective Biophysical Modeling of Cell Free Transcription and Translation Processes
Source: PubMed Central journal article supplement (PMC7726328; doi:10.3389/fbioe.2020.539081), 2020-11-26
Supplement: Data_Sheet_1.pdf [file Data_Sheet_1.pdf]

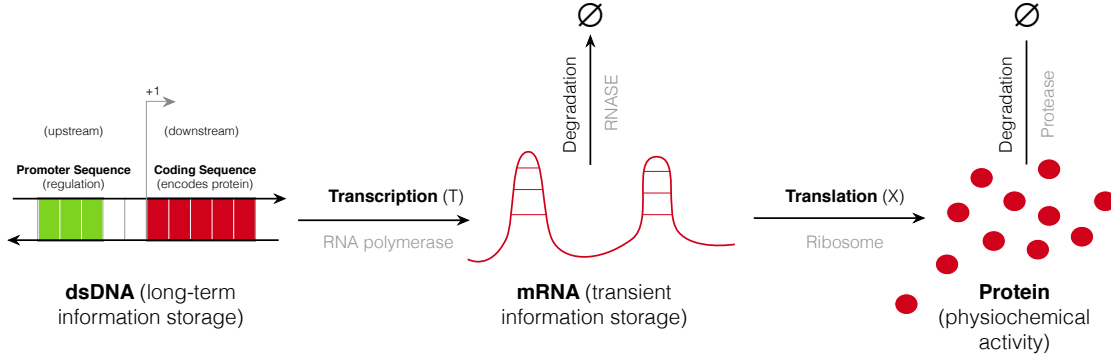

**Fig. S1:** Schematic of transcriptional (TX) and translation (TL) processes.

## Effective expressions for transcription (and translation) kinetics

To develop expressions for  $r_{X,i}$  (or  $r_{L,i}$ ) let us develop a mental model of the elementary steps occurring in transcription (Fig. S1). Our mental model for transcription, based upon the earlier work by McClure [48] and later Bailey [44], consists of a four step elementary reaction scheme:

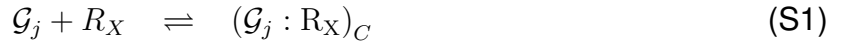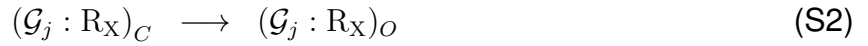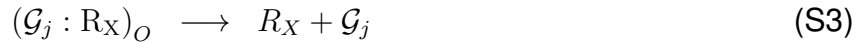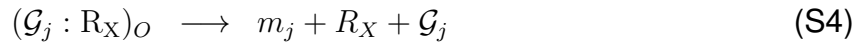

where  $\mathcal{G}_j$ ,  $R_X$  denote the gene and *free* RNA polymerase (RNAP) concentration, and  $(\mathcal{G}_j : R_X)_O$ ,  $(\mathcal{G}_j : R_X)_C$  denote the open and closed complex concentrations, respectively. Let the kinetic rate of transcription be directly proportional to the concentration of the open complex:

$$r_{X,j} = k_{E,j}^X (\mathcal{G}_j : R_X)_O$$

where  $k_{E,j}^X$  is the elongation rate constant for gene  $j$ . The key idea behind this derivation is that the RNAP (or Ribosome) acts as an enzyme. Thus, we might expect that we could use a strategy similar to enzyme kinetics to derive an expression for  $r_{X,j}$  (and  $r_{L,j}$ ). The material balances around the closed and open complex for gene  $j$  are given by:

$$\frac{d}{dt} (\mathcal{G}_j : R_X)_C = k_+ (\mathcal{G}_j) (R_X) - k_- (\mathcal{G}_j : R_X)_C - k_I (\mathcal{G}_j : R_X)_C \quad (\text{S5})$$

$$\frac{d}{dt} (\mathcal{G}_j : R_X)_O = k_I (\mathcal{G}_j : R_X)_C - k_A (\mathcal{G}_j : R_X)_O - k_{E,j}^X (\mathcal{G}_j : R_X)_O \quad (\text{S6})$$

where  $k_+$  ( $\text{conc}^{-1} \text{t}^{-1}$ ) and  $k_-$  ( $\text{t}^{-1}$ ) denote the on/off rate constant for RNAP at the promoter for gene  $j$ ,  $k_I$  ( $\text{t}^{-1}$ ) denotes the rate constant governing open complex formation and  $k_A$  ( $\text{t}^{-1}$ ) denotes the rate constant governing abortive initiation. The total abundance of RNAP, denoted as  $R_{X,T}$  is governed by:

$$R_{X,T} = R_X + (\mathcal{G}_j : R_X)_C + (\mathcal{G}_j : R_X)_O \quad (\text{S7})$$

At steady state, the abundance of the closed and open complexes can be estimated from the balance equations (where we have neglected the subscript  $j$  for simplicity):

$$(\mathcal{G}_j : R_X)_C \simeq \left( \frac{k_+}{k_- + k_I} \right) (\mathcal{G}_j) (R_X) \quad (\text{S8})$$

$$(\mathcal{G}_j : R_X)_O \simeq \left( \frac{k_I}{k_A + k_E^X} \right) (\mathcal{G}_j : R_X)_C \quad (\text{S9})$$

The ratio of parameters in the open and closed complex expressions have special significance which is apparent from looking at their units. For example, the ratio:

$$K_{X,j}^{-1} \equiv \left( \frac{k_+}{k_- + k_I} \right) \quad (\text{S10})$$

is a saturation constant for gene  $j$  with units of concentration, while:

$$\tau_{X,j}^{-1} \equiv \left( \frac{k_I}{k_A + k_E^X} \right) \quad (\text{S11})$$

is a time constant for gene  $j$  comparing the initiation, abortive initiation and elongation constants. We can relate the open complex to the concentration of gene  $j$  and *free* RNAP concentration by eliminating the closed complex concentration from the steady state expressions:

$$(\mathcal{G}_j : R_X)_O \simeq (K_{X,j}^{-1})(\tau_{X,j}^{-1})(\mathcal{G}_j)(R_X) \quad (\text{S12})$$

To estimate the *free* RNAP concentration we can use the total RNAP balance, where we have substituted expressions for the open and closed complex concentrations:

$$R_{X,T} = R_X + (K_{X,j}^{-1})(\mathcal{G}_j)(R_X) + (K_{X,j}^{-1})(\tau_{X,j}^{-1})(\mathcal{G}_j)(R_X) \quad (\text{S13})$$

Starting with Eqn (S13), solving for *free* RNAP concentration  $R_X$  gives:

$$R_X = \frac{R_{X,T}(\tau_{X,j}K_{X,j})}{\tau_{X,j}K_{X,j} + (\tau_{X,j} + 1)\mathcal{G}_j} \quad (\text{S14})$$

Now that we have  $R_X$  we can get the open complex concentration in terms of total RNAP:

$$(\mathcal{G}_j : R_X)_O \simeq \frac{R_{X,T}\mathcal{G}_j}{\tau_{X,j}K_{X,j} + (\tau_{X,j} + 1)\mathcal{G}_j} \quad (\text{S15})$$

Lastly, the kinetic rate of transcription is proportional to the open complex concentration which can now be substituted to give:

$$r_{X,j} = k_{E,j}^X R_{X,T} \left( \frac{\mathcal{G}_j}{\tau_{X,j}K_{X,j} + (\tau_{X,j} + 1)\mathcal{G}_j} \right) \quad (\text{S16})$$

In an identical procedure, we can also formulate a model of the translation rate:

$$r_{L,j} = k_{E,j}^L R_{L,T} \left( \frac{m_j}{\tau_{L,j} K_{L,j} + (\tau_{L,j} + 1) m_j} \right) \quad (\text{S17})$$

where  $m_j$  denotes the concentration of mRNA  $j$ .

**Which is limiting, elongation or initiation?** Ultimately, this question depends upon the gene of interest. However, we can see some interesting properties of  $r_{X,j}$  by considering limiting cases for the value of the time constant  $\tau_{X,j}$ . Assume the rate constant for abortive initiation  $k_A$  is small compared to both  $k_I$  and  $k_{E,j}^X$ :

$$\tau_{X,j} \simeq \frac{k_{E,j}^X}{k_I} \quad (\text{S18})$$

When  $\tau_{X,j} \gg 1$  (initiation limited) the kinetic transcription rate becomes:

$$r_{X,j} = \frac{k_{E,j}^X R_{X,T}}{\tau_{X,j}} \left( \frac{\mathcal{G}_j}{K_{X,j} + \mathcal{G}_j} \right) \quad (\text{S19})$$

while  $\tau_{X,j} \ll 1$  (elongation limited) gives:

$$r_{X,j} = k_{E,j}^X R_{X,T} \left( \frac{\mathcal{G}_j}{K_{X,j} \tau_{X,j} + \mathcal{G}_j} \right) \quad (\text{S20})$$

**How do we get values for  $k_+$ ,  $k_-$ ,  $k_I$ ,  $k_{E,j}^X$  and  $k_A$ ?** Generally speaking, except for  $k_{E,j}^X$  which we can estimate from first principles, estimating the value of  $k_+$ ,  $k_-$ ,  $k_I$  and  $k_A$  is difficult (especially *in-vivo*). Thus, let's start with  $k_{E,j}^X$ ; the elongation rate constant is proportional to the elongation rate of the polymerase  $e_X$  (units of nt s<sup>-1</sup>) multiplied by the length (nt) of the coding region of gene  $j$ , or  $\mathcal{L}_j$  (the length of DNA the RNAP has to read). However, typically we formulate  $k_{E,j}^X$  in a slightly different way; first, we compute an average or characteristic elongation rate constant  $\langle k_E^X \rangle$ , and then correct this

characteristic value by the actual length of gene  $j$ :

$$k_{E,j}^X = \langle k_E^X \rangle \left( \frac{\mathcal{L}}{\mathcal{L}_j} \right) \quad (\text{S21})$$

where:

$$\langle k_E^X \rangle = e_X \mathcal{L}^{-1} \quad (\text{S22})$$

and  $\mathcal{L}$  denotes some characteristic length, e.g., the average length of genes in *E.coli*. For the other parameters, we must estimate them from experimental data.

McClure performed a series of *in vitro* experiments to estimate  $k_I$  in transcription and produced a constraint governing permissible values for the remaining transcriptional parameters [48]. In particular, McClure used an abortive initiation assay in which the production of mRNA never completed. Instead, transcription always aborted leaving a stable open complex that could be directly measured. From these measurements, and a mental transcriptional model very similar to ours, McClure developed the expression:

$$\tau_{obs} = \frac{1}{k_I} + \frac{1}{R_{X,T}} \left( \frac{k_- + k_I}{k_+ k_I} \right) \quad (\text{S23})$$

where  $\tau_{obs}$  is the time required to fully form the open complex (measured) and  $R_{X,T}$  denotes the total concentration of RNAP. A value for  $k_I$ , and a relationship between the other parameters, can be obtained from the intercept and slope of a  $R_{X,T}^{-1}$  versus  $\tau_{obs}$  plot for a particular promoter of interest.
